# Supplementary material for: Anti-coke behavior of an alumina nanosheet supported Pt–Sn catalyst for isobutane dehydrogenation
Source: Royal Society of Chemistry journal article supplement (doi:10.1039/d0cy02154g), 2021-01-01
Supplement: d0cy02154g1.pdf [file d0cy02154g1.pdf]

## Supporting Information

### Anti-Coke Behaviour of Alumina Nanosheets Supported Pt-Sn Catalyst for Isobutane

#### Dehydrogenation

*Xin-Qian Gao, Wei Song, Wen-Cui Li, An-Hui Lu\**

State Key Laboratory of Fine Chemicals, School of Chemical Engineering, Dalian University of Technology, Dalian

116024, Liaoning, China

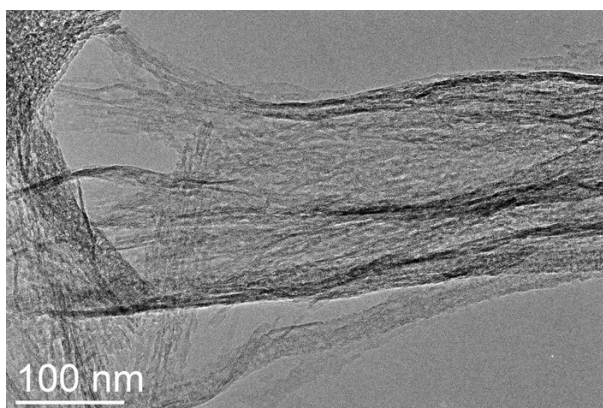

**Fig. S1.** TEM image of the alumina nanosheets.

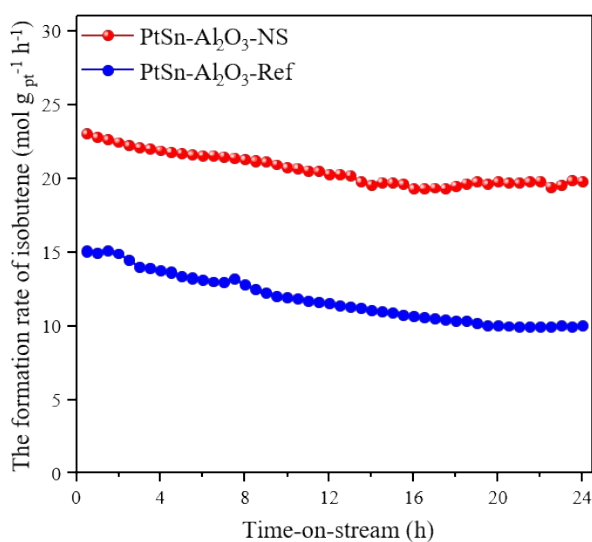

**Fig. S2.** Catalytic performances of IDH over PtSn-Al<sub>2</sub>O<sub>3</sub>-NS and PtSn-Al<sub>2</sub>O<sub>3</sub>-NS catalysts.

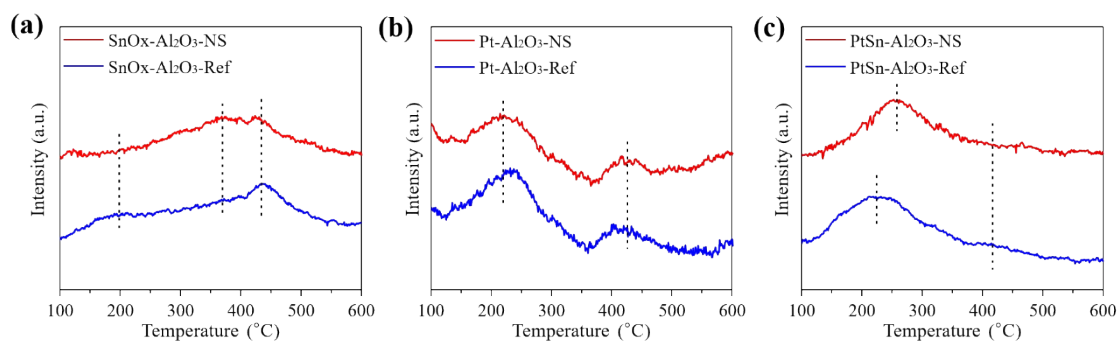

**Fig. S3.** H<sub>2</sub>-TPR spectra of SnO<sub>x</sub>-Al<sub>2</sub>O<sub>3</sub> (a), Pt-Al<sub>2</sub>O<sub>3</sub> (b), and PtSn-Al<sub>2</sub>O<sub>3</sub> (c).

**Table S1** Coordination states of Al<sup>3+</sup> in different samples

| Sample                                   | Percentage of different coordinated Al <sup>3+</sup> sites (%) |        |         |
|------------------------------------------|----------------------------------------------------------------|--------|---------|
|                                          | Al (VI)                                                        | Al (V) | Al (IV) |
| Al <sub>2</sub> O <sub>3</sub> -NS       | 53.7                                                           | 26.3   | 20.0    |
| Al <sub>2</sub> O <sub>3</sub> -Ref      | 74.1                                                           | 7.2    | 18.7    |
| PtSn-Al <sub>2</sub> O <sub>3</sub> -NS  | 59.3                                                           | 21.7   | 19.0    |
| PtSn-Al <sub>2</sub> O <sub>3</sub> -Ref | 73.6                                                           | 7.3    | 19.1    |

**Table S2** Acid strength distribution of different catalysts

| Sample                                   | Tmax (°C) |     |     | Total acid sites<br>(μmol NH <sub>3</sub> g <sup>-1</sup> ) | Area fraction (%) |                    |
|------------------------------------------|-----------|-----|-----|-------------------------------------------------------------|-------------------|--------------------|
|                                          | I         | II  | III |                                                             | Weak acid         | Medium-strong acid |
| PtSn-Al <sub>2</sub> O <sub>3</sub> -Ref | 170       | 224 | 306 | 310                                                         | 21                | 79                 |
| PtSn-Al <sub>2</sub> O <sub>3</sub> -NS  | 172       | 229 | 307 | 248                                                         | 40                | 60                 |

**Table S3** The intensity and area ratio of the D to G band on the spent catalyst surfaces

| Sample                                   | I <sub>D1</sub> /I <sub>G</sub> | A <sub>D1</sub> /A <sub>G</sub> |
|------------------------------------------|---------------------------------|---------------------------------|
| PtSn-Al <sub>2</sub> O <sub>3</sub> -NS  | 0.79                            | 4.78                            |
| PtSn-Al <sub>2</sub> O <sub>3</sub> -Ref | 0.67                            | 3.53                            |
